# Supplementary material for: Awakening a latent carbon fixation cycle in Escherichia coli
Source: PubMed Central journal article supplement (PMC7669889; doi:10.1038/s41467-020-19564-5), 2020-11-16
Supplement: 41467_2020_19564_MOESM4_ESM.pdf [file 41467_2020_19564_MOESM4_ESM.pdf]

## Description of Additional Supplementary Files

### Supplementary Data 1

Sequence of the genomic region upstream of the *pntA* gene in the isolated  $\Delta tkkAB$  + pGED mutant strain. Binding sites of the primers used for Sanger sequencing are in bold; coding sequence of the *pntA* gene is underlined; sequence of the IS5 mobile element is shown in red.

### Supplementary Data 2

Sequence of the construct (linear dsDNA) used for *pntA* promoter engineering with the  $\lambda$  Red recombinase method. Homologous regions for recombination are in bold lower-case; introduced promoter region is in upper-case; ribosome binding site + *pntA* start codon are underlined; CmR selection marker is shown in red.
